# Supplementary material for: Regioselective synthesis of novel spiro-isoxazolines congeners as antimicrobial agents: in vitro and in-silico assessments
Source: Front Chem. 2025 Dec 29;13:1740409. doi: 10.3389/fchem.2025.1740409 (PMC12791170; doi:10.3389/fchem.2025.1740409)
Supplement: Supplementary file 1 [file DataSheet1.docx]

**Regioselective Synthesis of Novel Spiro-Isoxazolines Congeners as antimicrobial agents: *In Vitro* and *In-silico* Assessments**

Rachid BOUZAMMIT a,Soumia AIT ASSOU b, Mohammed ER-RAJY c, Noura AFLAK d, Lahoucine BAHSIS e, Mohammed CHALKHA a,f,*, Mohammed El HASSOUNI b, Mohammed LACHKAR a, Taibi BEN HADDA g , Daryn BENSON g Abdullah A. ALYOUSEFh, Mourad A. M. ABOUL-SOUDi, John P. GIESYj,k,l and Ghali AL HOUARI a,*

*aEngineering Laboratory of Organometallic, Molecular Materials and Environment (LIMOME), Faculty of Sciences, University Sidi Mohamed Ben Abdellah, 30000 Fez, Morocco.*

*bBiotechnology, Environment, Agri-Food and Health Laboratory, Faculty of Sciences Dhar El Mahraz, Sidi Mohamed Ben Abdellah University, BP. 1796, Atlas, Fez, Morocco.*

*cLIMAS Laboratory, Chemistry Department, Faculty of Sciences Dhar El Mahraz, Sidi Mohamed Ben Abdellah University, 30000 Fez, Morocco.*

*dTeam of Organic Chemistry and Valorization of Natural Substances, Faculty of Sciences, University Ibn Zohr, BP 8106, Cite Dakhla, 80000 Agadir, Morocco.*

*eFaculté Polydisciplinaire de Safi, Université Cadi Ayyad, 46030 Safi, Morocco.*

*fLaboratory of Materials Engineering for the Environment and Natural Resources, Faculty of Sciences and Techniques, University of Moulay Ismail, B.P 509, Boutalamine, 52000, Errachidia, Morocco.*

*gEuromed University of Fes (UEMF), Road of Meknez, Fez 30000, Morocco.*

*h Clinical Laboratory Sciences Department, College of Applied Medical Sciences, King Saud University, P.O. Box 17 10219, Riyadh 11433, Saudi Arabia*

*iCenter of Excellence in Biotechnology Research (CEBR), College of Applied Medical Sciences, King Saud University, P.O. Box 17 10219, Riyadh 11433, Saudi Arabia*

*jDepartment of Veterinary Biomedical Sciences and Toxicology Centre, Western College of Veterinary Medicine, University of Saskatchewan, Saskatoon, SK S7N 5B4, Canada,*

*kDepartment of Integrative Biology and Center for Integrative Toxicology, Michigan State University, East Lansing, MI 48824, USA*

*lDepartment of Environmental Sciences, Baylor University, Waco, 76706, USA*

*Corresponding authors: Mohammed CHALKHA (mohammed.chalkha1@usmba.ac.ma), Ghali AL HOUARI (ghalialhouari@gmail.com )

1. **General information**

All the chemicals used were of analytical grade and were employed without further purification, sourced from commercial suppliers. The progress of the reactions was monitored by thin-layer chromatography (TLC) (Merck, silica gel 60 F254), with spots visualized under UV light (Vilber Lourmat, VL-215.LC). The melting points were determined with an uncertainty of ±2 °C using a Koﬂer Bench. The IR spectra were recorded in the range of 4000 to 450 cm⁻¹ on a Bruker Vertex 70 FT-IR spectrometer, and wavenumbers are given in cm⁻¹. The NMR spectra (1H and 13C) were recorded at room temperature on a Bruker Avance II 300 UltraShield spectrometer (300 MHz for 1H and 75 MHz for 13C) using CDCl3 as the solvent. For the 13C NMR spectra, the APT experiment was used, providing information on the multiplicity of the 13C signals (CH3, CH2, CH, and Cq). In these spectra, the negative signals correspond to the CH3 and CH carbons, while the positive signals correspond to the CH2 and quaternary C carbons. The chemical shifts are expressed in ppm and the coupling constants J in Hertz (Hz). The spin multiplicities are reported as singlet (s), doublet (d), triplet (t), multiplet (m), doublet of doublets (dd), doublet of triplets (dt), and broad (br). High-resolution mass spectra were recorded on a Waters/Vion IMS-QTOF spectrometer, equipped with an electrospray ionization (ESI) source operating in both positive and negative ion modes.

1. **Method for synthesizing spiroisoxazolines**

In a 100 ml Erlenmeyer flask, introduce 2 mmol of arylidene tetralone 1 and 2.4 mmol of aryl nitrile oxide 2. Dissolve these reactants in 15 ml of chloroform (CHCl₃), then add five drops of trimethylamine (Et₃N). Stir the mixture using a magnetic stirrer at room temperature (20-30 °C) for 34 hours to ensure the reaction is complete. The reaction progress is monitored periodically by thin-layer chromatography (TLC) using an appropriate eluent system (7/3: hexane/ether). Once the reaction is complete, transfer the mixture to a separating funnel and wash until a pH of 7 is achieved. Dry the product over anhydrous sodium sulfate and filter. Evaporate the chloroform from the organic layer under reduced pressure using a rotary evaporator. Finally, recrystallize the obtained solid in a mixture of ethanol/dichloromethane (8/2: EtOH/CH2Cl2) and collect the pure solids by vacuum filtration.

- (**3a**): 3',4-dimethyl-3-phenyl-3',4'-dihydro-1'H,4H-spiro[isoxazole-5,2'-naphthalene]-1'-one.

Orange crystals, m.p = 168-170 ºC, Yield 68%; **IR** (KBr, ν in cm-1): ν =1700 (C=O); **1H NMR** (300 MHz, CDCl3, δ in ppm): δ =1.11 (d, 3H, CH3(3’’), *J* = 7.2 Hz), 1.30 (d, 3H, CH3(4’’), *J* = 7.2 Hz), 2.78-3.80 (dd, 2H4, CH2,*J* = 7.2 Hz), 2.90 (m, H3), 4.31 (q, H**4’iso**,*J*= 7.2 Hz), 7.26-7.35 (m, 2H-Ar), 7.42-7.47 (m, 3H-Ar), 7.53 (tt, 1H-Ar, *J* = 1.5 Hz, *J* = 6 Hz, *J* = 7.5 Hz), 7.78-7.98 (m, 2H-Ar), 7.96 (dd, 1H-Ar, *J* = 1.2 Hz, *J* = 6.6 Hz); **13C NMR** (75 MHz, CDCl3, δin ppm): CH3(3’’) (11.54), CH3(4’’) (15.40), CH**4’iso** (32.05), C3 (40.65), C4 (33.32), 40.65, C**2,5’** (90.81), 126.67,127.37, 128.13, 128.41, 128.84, 129.41, 130.30, 130.80, 133.88, 141.12, 164.78, C**3’**=N (164.78), C=O(192.04); **Elementary analysis**: (calculated /found) %C = 78.68/78.0103, %H = 6.22/6.2251, %N = 4.59/4.5427; **ESI-QTOF-MS** (m/z): mass calculated for [C20H19NO2-H]+: 306.14886, mass found: 306.14850.

- (**3b):** 3-(4-chlorophényl)-3',4-diméthyl-3',4'-dihydro-1'H,4H-spiro[isoxazole-5,2'-naphtalène]-1'-one.

White crystals, m.p = 170 ºC, Yield 84%; **IR** (KBr, ν in cm-1): ν =1690 (C=O); **1H NMR** (300 MHz, CDCl3, δ in ppm): δ =1.00 (d, 3H, CH3(3’’),*J* = 6.9 Hz), 1.18 (d, 3H, CH3(4’’), *J* = 7.2 Hz), 2.81-2.92 (m, 1H4, 1H3), 3.53 (dd, 1H4,*J* = 4.5 Hz,*J* = 12.6 Hz), 4.29 (q, H**4’iso,** *J* = 7.2 Hz), 7.36-7.41 (m, 2H-Ar), 7.56-7.66 (m, 3H-Ar), 7.79-7.87 (m, 3H-Ar); **13C NMR** (75 MHz, CDCl3, δin ppm): CH3(3’’) (11.74), CH3(4’’) (15.34), CH**4’iso** (31.51), C4 (39.16), C3 (40.00), C**2,5’** (91.21), 127.27, 127.32, 127.66, 129.26, 129.70, 130.28, 130.52, 134.78, 135.65, 141.62, C**3’**=N (164.34), C=O(191.71); **Elementary.analysis** :.( calculated/found) %C=70.76/70.1565, %H=5.30/5.3095, %N=4.12/4.3207; **ESI-QTOF-MS** (m/z): mass calculated for [C20H18ClNO2-H]+: 340.10988, mass found: 340.10954.

- (**3c):** 3-(4-methoxyphenyl)-3',4-dimethyl-3',4'-dihydro-1'H,4H-spiro[isoxazole-5,2'-naphthalene]-1'-one.

Orange crystals, m.p **=** 208 ºC, Rdt 88%; **IR** (KBr, ν in cm-1):ν =1690 (C=O); **1H NMR** (300 MHz, CDCl3, δ in ppm); δ =1.10 (d, 3H, CH3(3’’),*J* = 6.9 Hz), 1.29 (d, 3H, CH3(4’’), *J* = 7.2 Hz), 2.77-3.78 (dd, 2H4, CH2,*J* = 1.5 Hz, *J* = 15.6 Hz), 2.90-2.95 (m, H3), 3.96 (s, Ar-OCH3), 4.22 (q, H**4’iso,** *J* = 7.5 Hz), 6.79 (d, H-Ar, *J* = 8.4 Hz), 7.00-7.34 (m, 3H-Ar), 7.49-7.55 (m, 1H-Ar), 7.65-7.68 (dd, 1H-Ar, *J* = 2.1 Hz, *J* = 6.6 Hz), 7.82 (d, 1H-Ar, *J* = 2.1 Hz), 7.99 (dd, 1H-Ar, *J* = 0.9 Hz, *J* = 6.9 Hz), **13C NMR** (75 MHz, CDCl3, δin ppm): CH3(3’’) (11.53), CH3(4’’) (15.35), CH**4’iso** (31.99), C4 (33.29), C3 (40.72), Ar-OCH3 (56.29), C**2,5’** (90.83), 12.05, 121.85, 123.06, 126.68, 127.07, 128.11, 129.16, 129.41, 130.73, 133.91,141.09, C**3’**=N (163.51), C=O(191.98); **Elementary.analysis**: (calculated/found) %C=75.13/74.8636, %H=6.26/5.6851, %N=4.17/3.7915; **ESI-QTOF-MS** (m/z): mass calculated for [C21H21NO3-H]+: 336.15942, mass found: 336.15905.

- (**3d):** 3',4-dimethyl-3-(p-tolyl)-3',4'-dihydro-1'H,4H-spiro[isoxazole-5,2'-naphthalene]-1'-one.

White crystals, m.p = 198-200 ºC, Yield 63%; **IR** (KBr, ν in cm-1): ν =1690 (C=O); **1H NMR** (300 MHz, CDCl3, δ in ppm): δ =1.10 (d, 3H, CH3(3’’),*J* = 7.2 Hz), 1.30 (d, 3H, CH3(4’’),*J* = 7.5 Hz), 2.41 (s, Ar-CH3), 2.78-3.79 (dd, 2H4, CH2,*J* = 1.5 Hz,*J* = 15.6 Hz), 2.90-2.94 (m, H3), 4.29 (q, H**4’iso**,*J* = 7.5 Hz), 7.24-7.49 (m, 3H-Ar), 7.52 (tt, 1H-Ar, *J* = 1.5 Hz, *J* = 6 Hz, *J* = 7.5 Hz), 7.70 (d, 2H-Ar), 7.67 (dd, 1H-Ar, *J* = 1.2 Hz, *J* = 6.6 Hz); **13C NMR** (75 MHz, CDCl3, δin ppm): CH3(3’’) (11.59), CH3(4’’) (15.40), Ar-CH3 (21.50), CH**4’iso** (32.06), C4 (33.33), C3 (40.65), C**2,5’** (90.61), 125.55, 126.64,127.31, 128.12, 129.39, 129.54, 130.84, 133.82, 140.55, 141.11, C**3’**=N (164.74), C=O(192.11); **Elementary.analysis**:.( calculated/found).%C=78.99/78.4700, %H=6.58/6.6016; %N=4.38/4.3599; **ESI-QTOF-MS** (m/z): mass calculated for [C21H21NO2-H]+: 320.16451, mass found: 320.16395.

1. **Copies of IR, 1H, 13C NMR and HRMS spectra of compounds**

## Spectra of compound **3a-d**

## Spectra of 3',4-dimethyl-3-phenyl-3',4'-dihydro-1'H,4H-spiro[isoxazole-5,2' naphthalen]-1'-one **3a**


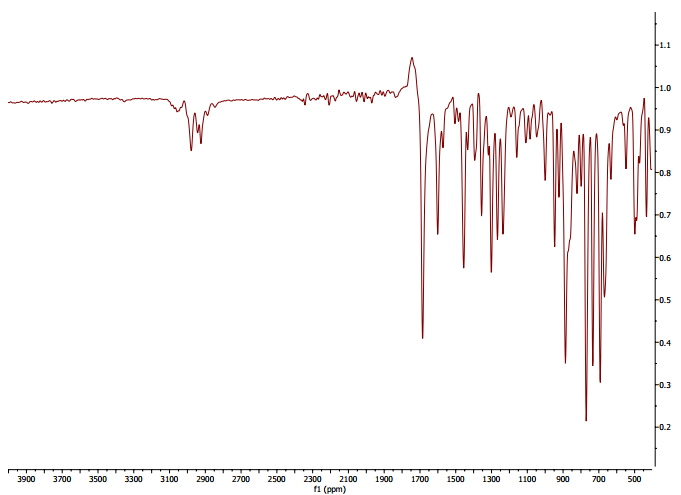


Figure 1. IR spectra of compound 3a


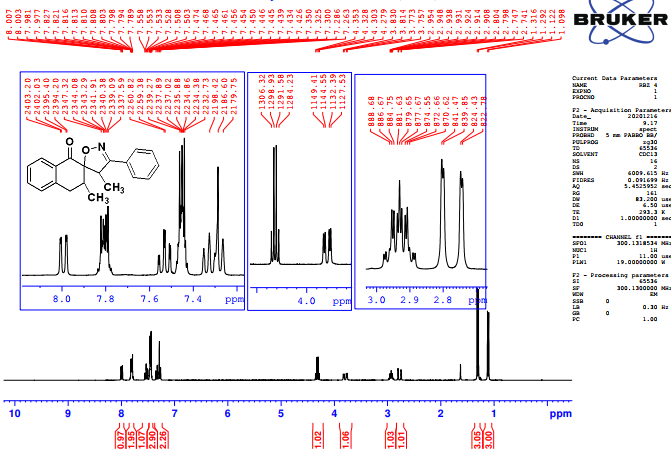


Figure 2. 1H NMR spectrum (300 MHz, CDCl3) of compound 3a


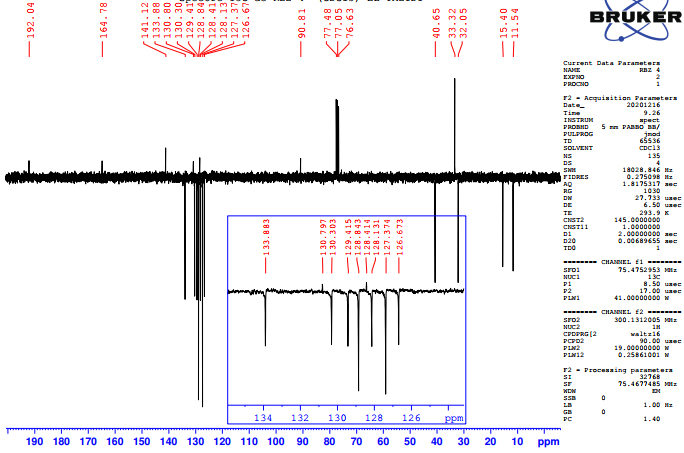


Figure 3. 13C NMR spectrum (75 MHz, CDCl3) of compound 3a


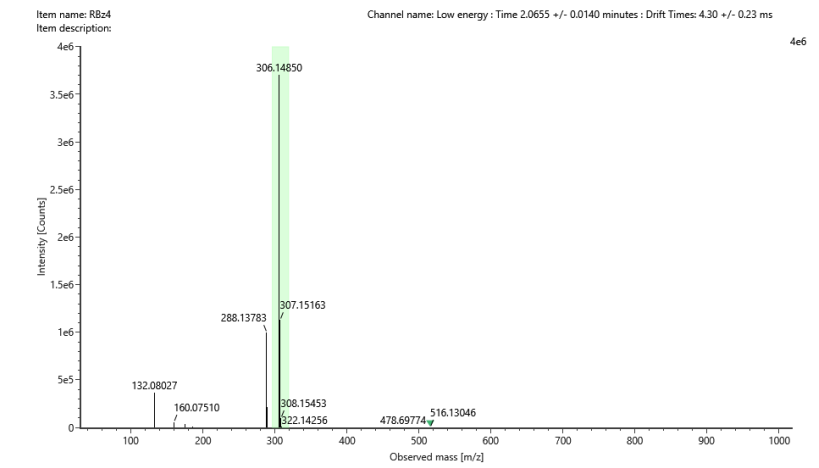


Figure 4. Mass spectrum of compound 3a

## Spectra of 3-(4-chlorophenyl)-3',4-dimethyl-3',4'-dihydro-1'H,4H-spiro[isoxazole-5,2'-naphthalen]-1'-one **3b**


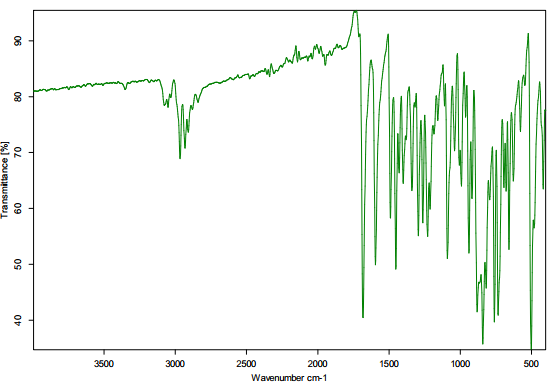


Figure 5. IR spectra of compound 3b


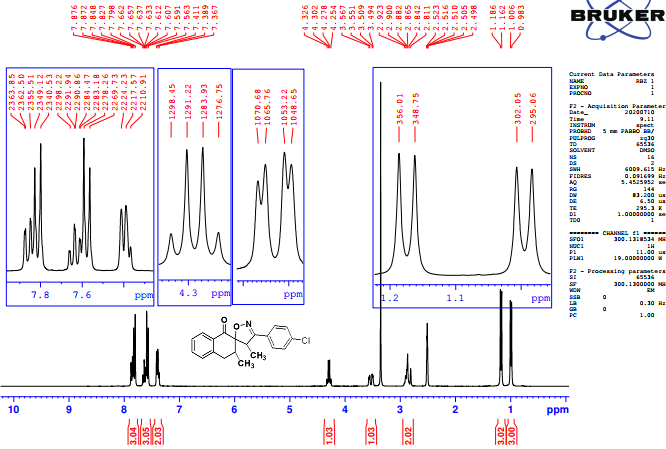


Figure 6. 1H NMR spectrum (300 MHz, CDCl3) of compound 3b


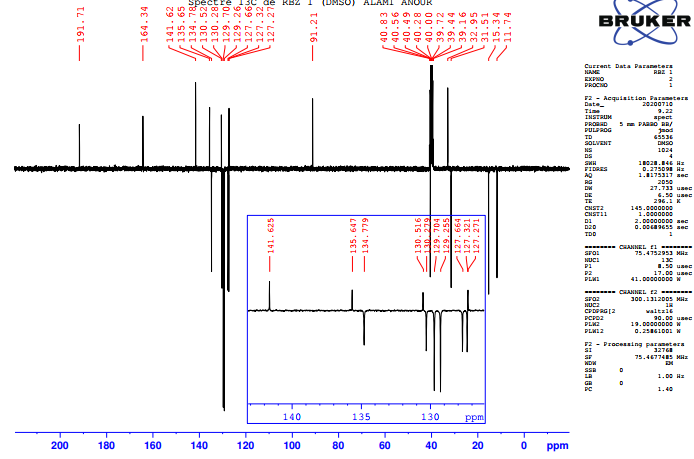


Figure 7. 13C NMR spectrum (75 MHz, CDCl3) of compound 3b


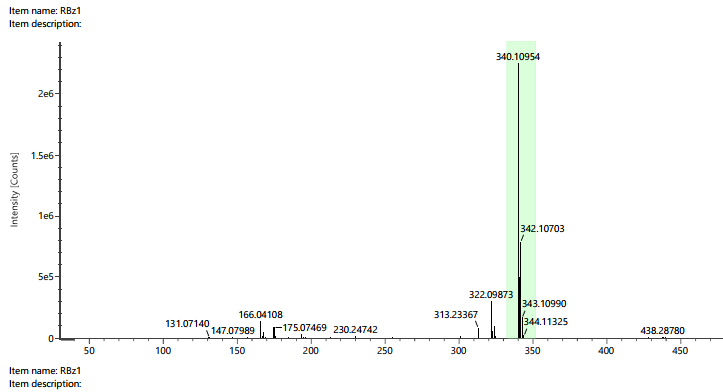


Figure 8. Mass spectrum of compound 3b

## Spectra of 3',4-dimethyl-3-(p-tolyl)-3',4'-dihydro-1'H,4H-spiro[isoxazole-5,2'-naphthalen]-1'-one **3c**


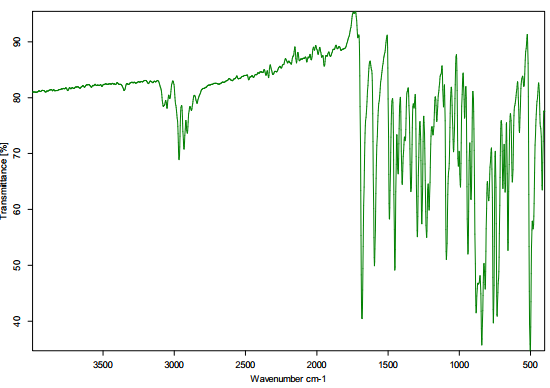


Figure 9. IR spectra of compound 3c


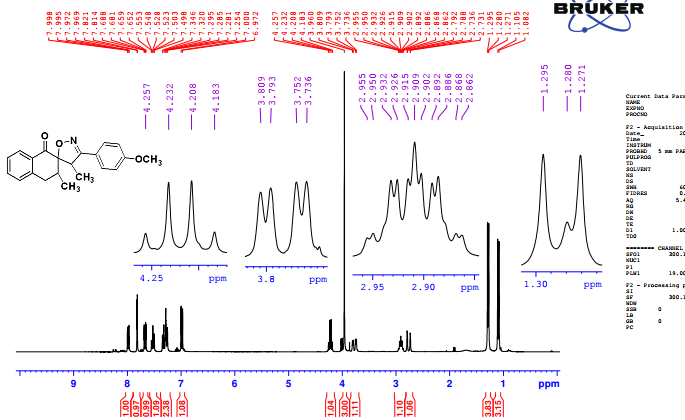


Figure 10. 1H NMR spectrum (300 MHz, CDCl3) of compound 3c


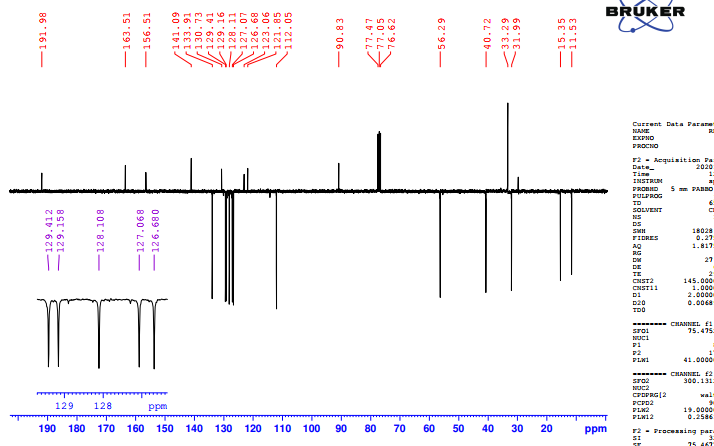


Figure 11. 1H NMR spectrum (75 MHz, CDCl3) of compound 3c


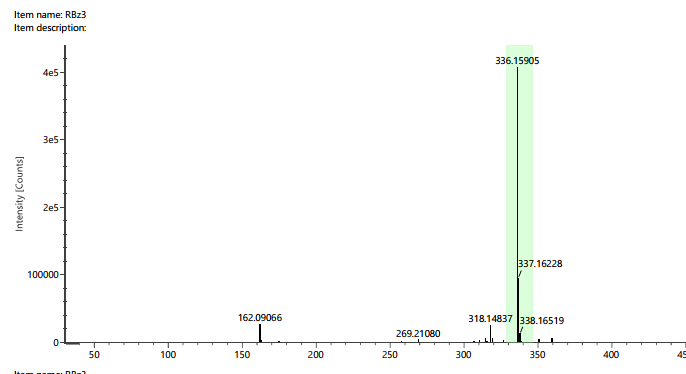


Figure 12. Mass spectrum of compound 3c

## Spectra of 3',4-dimethyl-3-(p-tolyl)-3',4'-dihydro-1'H,4H-spiro[isoxazole-5,2'-naphthalen]-1'-one **3d**


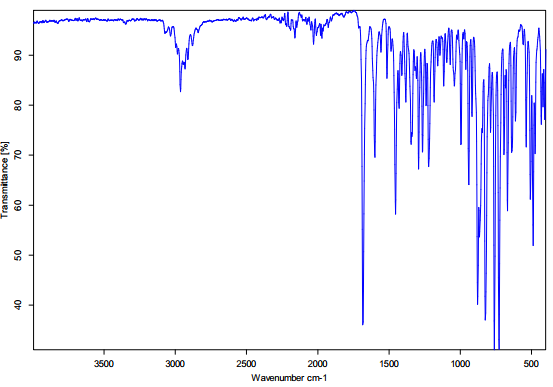


Figure 13. IR spectra of compound 3d


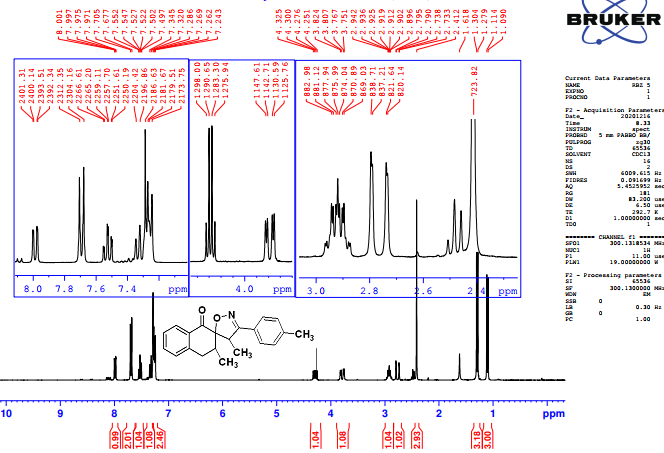


Figure 14. 1H NMR spectrum (300 MHz, CDCl3) of compound 3d


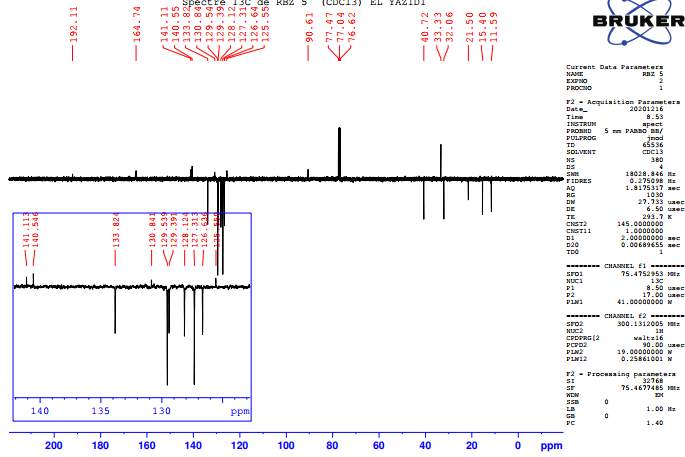


Figure 15. 13C NMR spectrum (75 MHz, CDCl3) of compound 3d


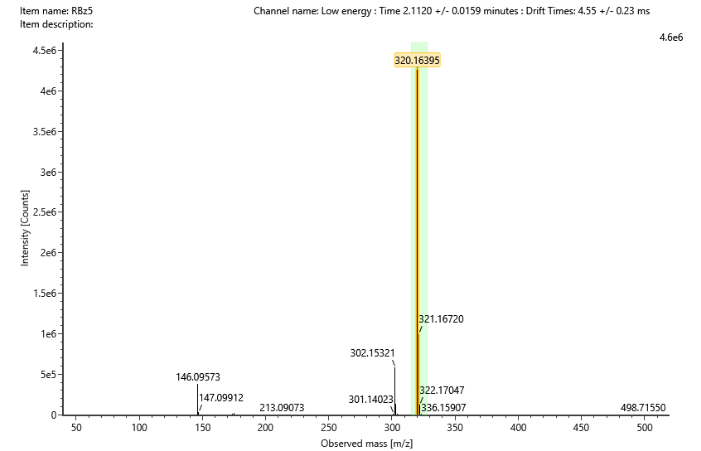


Figure 16. Mass spectrum of compound 3d.
